# Supplementary material
Source: publisher site journal article supplement (https://www.spandidos-publications.com/3641/downloadSupplementary)

Figure S1. Cyclin-dependent kinase inhibitor 2A FISH with L-probe and S-probe in normal control tissue. In both FISH probes [(A) S-probe and (B) L-probe], lymphocytes exhibited normal signals (blue arrow). FISH, fluorescence *in situ* hybridization; L-probe, long probe; S-probe, short probe.

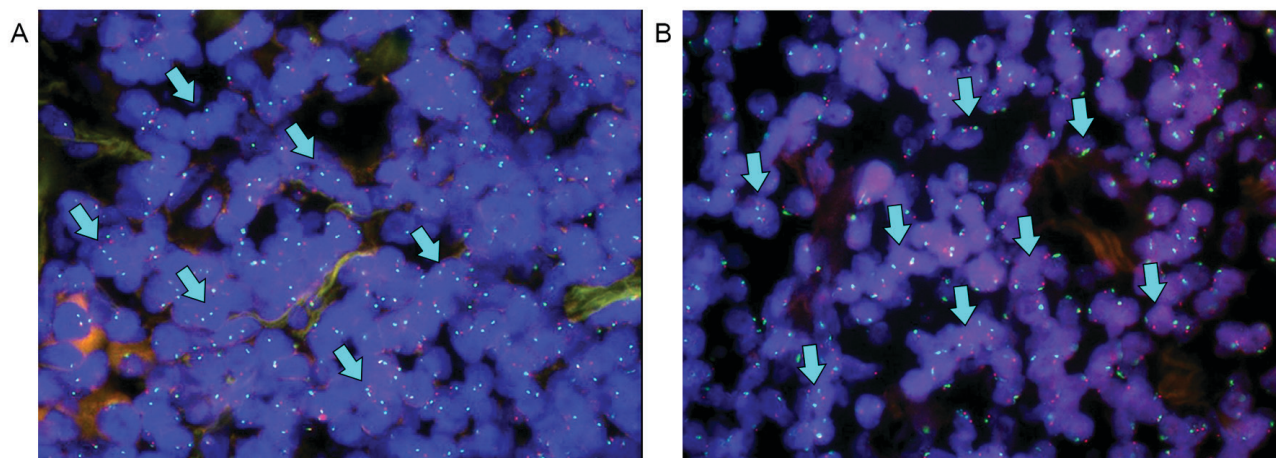

Supplement: Supplementary file 1 [file downloadSupplementary]
